# Promoter-Enhancer Interactions Identified from Hi-C Data using Probabilistic Models and Hierarchical Topological Domains

Gil Ron<sup>1</sup>, Dror Moran<sup>1</sup> and Tommy Kaplan<sup>1\*</sup>

<sup>1</sup>School of Computer Science and Engineering, The Hebrew University of Jerusalem, Jerusalem, 91904, Israel

Corresponding author. E-mail: [tommy@cs.huji.ac.il](mailto:tommy@cs.huji.ac.il) (TK)

## Abstract

Proximity-ligation methods as Hi-C allow us to map physical DNA-DNA interactions along the genome, and reveal its organization in topologically associating domains (TADs). As Hi-C data accumulate, computational methods were developed for identifying domain borders in multiple cell types and organisms.

Here, we present PSYCHIC, a computational approach for analyzing Hi-C data and identifying Promoter-Enhancer interactions. We use a unified probabilistic model to segment the genome into domains, which we merge hierarchically and fit the Hi-C interaction map with a local background model. This allows us to estimate the expected number of interactions for every DNA-DNA pair, thus identifying over-represented interactions across the genome.

By analyzing published Hi-C data in human and mouse, we identified hundreds of thousands of putative enhancers and their target genes in multiple cell types, and compiled an extensive genome-wide catalog of gene regulation in human and mouse.

## Introduction

One of the key mechanisms of gene regulation in eukaryotes involves enhancer-promoter interactions, where distal regulatory regions along the DNA (enhancers) come in close physical proximity to their target promoters, to further activate transcription. The human genome is estimated to contain hundreds of thousands of enhancers, often with multiple enhancers regulating a single gene. These act in a tissue specific manner and could be found up to 1Mb away from their target genes (Fraser and Bickmore 2007, Visel et al. 2009, Van Steensel and Dekker 2010, Bickmore and van Steensel 2013, Dekker and Mirny 2016, Rowley and Corces 2016). The importance of enhancers for gene regulation is further emphasized by a growing body of works that link genetic variation in enhancer sequences to human diseases (Lettice et al. 2003, Claussnitzer et al. 2015, Lupiáñez et al. 2015, Achinger-Kawecka and Clark 2016, Franke et al. 2016).

36 Nonetheless, we still lack a deep understanding of how enhancers work molecularly, how their  
37 tissue specificity is encoded in their DNA sequence, and above all how they recognize and  
38 physically interact with their target genes.

39

40 In recent years, high-throughput molecular methods have been developed to study the three-  
41 dimensional organization of the genome, and its relation to various functions. For example,  
42 proximity ligation methods such as 4C, ChIA-PET and Hi-C quantify the frequency of DNA-DNA  
43 interactions in living cells and map the 3D organization of the genome in high resolution (Simonis  
44 et al. 2006, Lieberman-Aiden et al. 2009, Handoko et al. 2011, Jin et al. 2013, Kieffer-Kwon et al.  
45 2013, Rao et al. 2014, Fraser et al. 2015, Lajoie et al. 2015, Mifsud et al. 2015). To date, Hi-C  
46 experiments were performed in a variety of organisms and cellular conditions, including many cell  
47 types and tissues.

48

49 While the genomic resolution of these data is often low, varying from few Kbs to 40Kb blocks, they  
50 were mainly used to identify and delineate topologically associating domains (TADs). These are  
51 continuous regions (hundreds of Kb to few Mbs) that were shown to be folded upon themselves  
52 into local compartments and facilitate high number of local (cis) DNA-DNA interactions (Dixon et al.  
53 2012, Nora et al. 2012, de Laat and Duboule 2013, Rao et al. 2014).

54 In recent years, topological domains were studied extensively, and were shown to be related to  
55 replication domains (Pope et al. 2014, Dileep et al. 2015), to be largely conserved across  
56 evolution, and to play a crucial role in chromosome function (Ryba et al. 2010, Dixon et al. 2012,  
57 Gómez-Marín et al. 2015, Jager et al. 2015, Vietri Rudan et al. 2015, Taberlay et al. 2016).

58 TADs also play a key role in gene regulation, as they define the regulatory scope of enhancers.  
59 The domains boundaries were shown to act as regulatory “insulators” that prevent targeting genes  
60 outside of the enhancer domain (Doyle et al. 2014, Symmons et al. 2014). Disruptions of the  
61 chromosomal structure, either in human genetic disorders or by artificially deleting boundary  
62 elements (e.g. using CRISPR-Cas9), were shown to be associated with enhancer mis-regulation  
63 and aberrant gene expression (Zhang et al. 2013, Lupiáñez et al. 2015, Achinger-Kawecka and  
64 Clark 2016, Blinka et al. 2016, Franke et al. 2016, Fulco et al. 2016). While we still lack a deep  
65 understanding of the exact mechanisms by which topological domains are defined and maintained,  
66 TAD borders seem be enriched for highly transcribed genes (Dixon et al. 2012), as well as CTCF  
67 and cohesin binding sites (Demare et al. 2013, Seitan et al. 2013, Ong and Corces 2014, Zuin et  
68 al. 2014, Ing-Simmons et al. 2015, Nichols and Corces 2015, Tang et al. 2015, Vietri Rudan et al.  
69 2015, Fudenberg et al. 2016).

70 As more and more 3D data accumulate, in a multitude of tissues and cellular conditions, algorithms  
71 were developed to analyze Hi-C data and partition the genome into a set of topological domains  
72 (Dixon et al. 2012, Ay et al. 2014, Lévy-Leduc et al. 2014, Fraser et al. 2015, Lajoie et al. 2015,

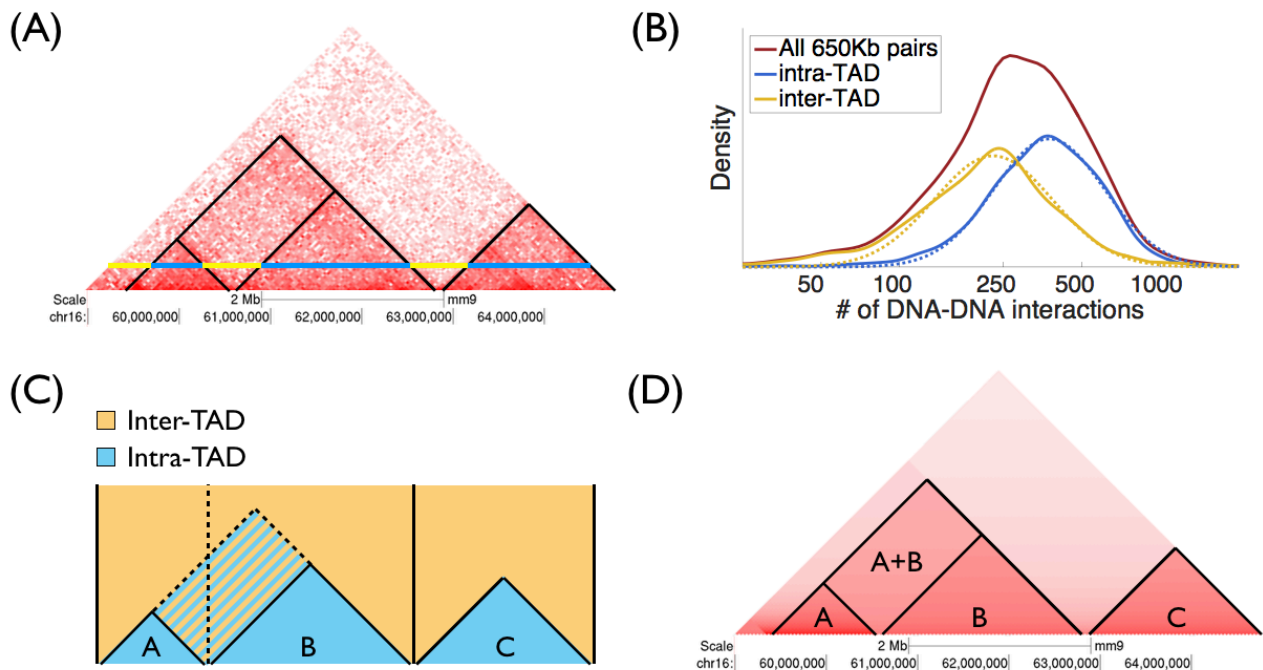

**Figure 1. Overview of the PSYCHIC algorithm**

(A) Example of Hi-C interaction map (rotated in 45°), from mouse cortex (chr16, 59Mb - 64.8Mb) (Dixon et al. 2012). Blue and yellow lines correspond to DNA-DNA pairs, 650Kb apart, within and across domains. (B) Histograms show the empirical abundance of DNA-DNA interactions (650Kb apart), located within domains (blue), or across domains (yellow). Dotted lines mark the density function of log-Normal distribution fitted to the empirical data. (C) This unified probabilistic mixture model is used to compare the intra- and inter-domain models for each cell in the Hi-C matrix. For example, a proposed segmentation into three domains A-C (delineated by vertical lines), would prefer the intra-TAD model for Hi-C cells within the domains (shown in blue) and the inter-TAD model outside (yellow). An alternative segmentation, where A and B domains are unified would only differ in striped rectangle. Dynamic Programming algorithm identifies the optimal (Viterbi) segmentation of the chromosome into domains. (D) PSYCHIC then iteratively merge similar neighboring domains (here, A+B) into a hierarchical structures. Finally, a bi-linear power-law model is used to reconstruct a specific background model for each domain/merge of the Hi-C map, allowing for the identification of over-represented DNA-DNA pairs, including putative promoter-enhancer interactions.

73 Adhikari et al. 2016, Chen et al. 2016, Xu et al. 2016). Most notable is the statistical method by  
 74 Dixon et al (2012), which scans the genome by analyzing the set of DNA-DNA interactions for  
 75 every locus, and identifies transitions from loci with mostly backward interactions to adjacent loci  
 76 with mostly forward interactions. While this method is generally fast and robust, it is inherently  
 77 biased towards short-range interactions that form the vast majority of DNA-DNA interactions. This  
 78 method also ignores a visible feature of Hi-C maps - the hierarchal structure of sub-domains  
 79 organized into larger domains (Fraser et al. 2015).

80

81 Here, we present PSYCHIC (Fig 1) - a three step modular algorithm to identify promoter-enhancer  
 82 interactions. Briefly, we use a unified probabilistic model and a Dynamic Programming algorithm to  
 83 find an optimal segmentation of each chromosome into topological domains; we next iteratively  
 84 merge neighboring domains into hierarchical structures; and finally we fit each domain using a  
 85 local background model. This allows us to identify over-represented DNA-DNA pairs, including  
 86 enhancers and their target genes. We have analyzed Hi-C data from 15 conditions and cell types

87 in mouse and human (Dixon et al. 2012, Rao et al. 2014, Fraser et al. 2015), and identified  
88 hundreds of thousands of over-represented interactions. This comprehensive genome-wide tissue-  
89 specific database of putative interactions between enhancers and their target genes would be of  
90 great interest to the scientific community.

## 91 Results

### 92 A Unified Probabilistic Mixture Model for Hi-C Data

93 Hi-C interaction maps often show a clear distinction between two different patterns. Rectangular  
94 regions along the diagonal of the Hi-C map correspond to topological domains, and present high  
95 intensity of (intra-domain) DNA-DNA interactions. These are often surrounded by regions with  
96 fewer (inter-domain) DNA-DNA interactions. Due to symmetry, Hi-C maps are often rotated in 45  
97 degrees, with topological domains shown as isosceles right triangles along the (now horizontal)  
98 diagonal of the Hi-C map (Fig. 1A).

99 We begin by developing a simple two-component probabilistic model, corresponding to the  
100 probability of intra- and inter-TAD interactions. In brief, our algorithm analyzes the Hi-C interaction  
101 matrix, and infers for every cell (DNA-DNA pair) the Log Probability Ratio (LPR) of these loci  
102 occurring within the same topological domain or not. At the following stages we will combine these  
103 ratios into a unified score, and use Dynamic Programming to optimally segment each chromosome  
104 into domains.

105 Formally, let  $P_d(\mathbf{N})$  denote the probability of observing  $\mathbf{N}$  Hi-C interactions between two DNA loci  $\mathbf{d}$   
106 bases apart. This equals to the sum of the intra-domain and inter-domain sub-models:

$$P_d(N) = P_d(TAD) \cdot P_d(N|TAD) + P_d(BG) \cdot P_d(N|BG) \quad (1)$$

107 where  $P_d(\mathbf{N} | TAD)$  and  $P_d(\mathbf{N} | BG)$  correspond to the likelihood of observing  $\mathbf{N}$  interactions  $\mathbf{d}$  bp  
108 apart in the intra- and inter-TAD sub-models, respectively.  $P_d(TAD)$  and  $P_d(BG)$  correspond to the  
109 *a priori* probability of observing two loci  $\mathbf{d}$  bp apart to be within or outside of the same TAD. For  
110 simplicity and robustness, we model  $N$  using a log-Normal distribution:

$$P_d(N|TAD) = \log\text{-Normal}(\mu_d^{TAD}, \sigma_d^{TAD}) \quad (2)$$

111 where the log-Normal distribution with mean  $\mu$  and standard deviation  $\sigma$  can be written as:

$$P(x) = \frac{1}{x\sigma\sqrt{2\pi}} e^{-(\log x - \mu)^2 / 2\sigma^2} \quad (3)$$

112 This greatly reduces the number of free parameters, resulting in a compact model  $\theta_d$  with only six  
113 parameters for every distant  $\mathbf{d}$ , including  $\mu_d^{TAD}$ ,  $\sigma_d^{TAD}$ ,  $\mu_d^{BG}$ , and  $\sigma_d^{BG}$  (mean and standard deviation  
114 parameters for intra- and inter-TAD models); and two prior parameters  $P_d(TAD)$  and  $P_d(BG)$ , while  
115 maintaining robust and accurate approximation of the empirical distributions (Figure S1).

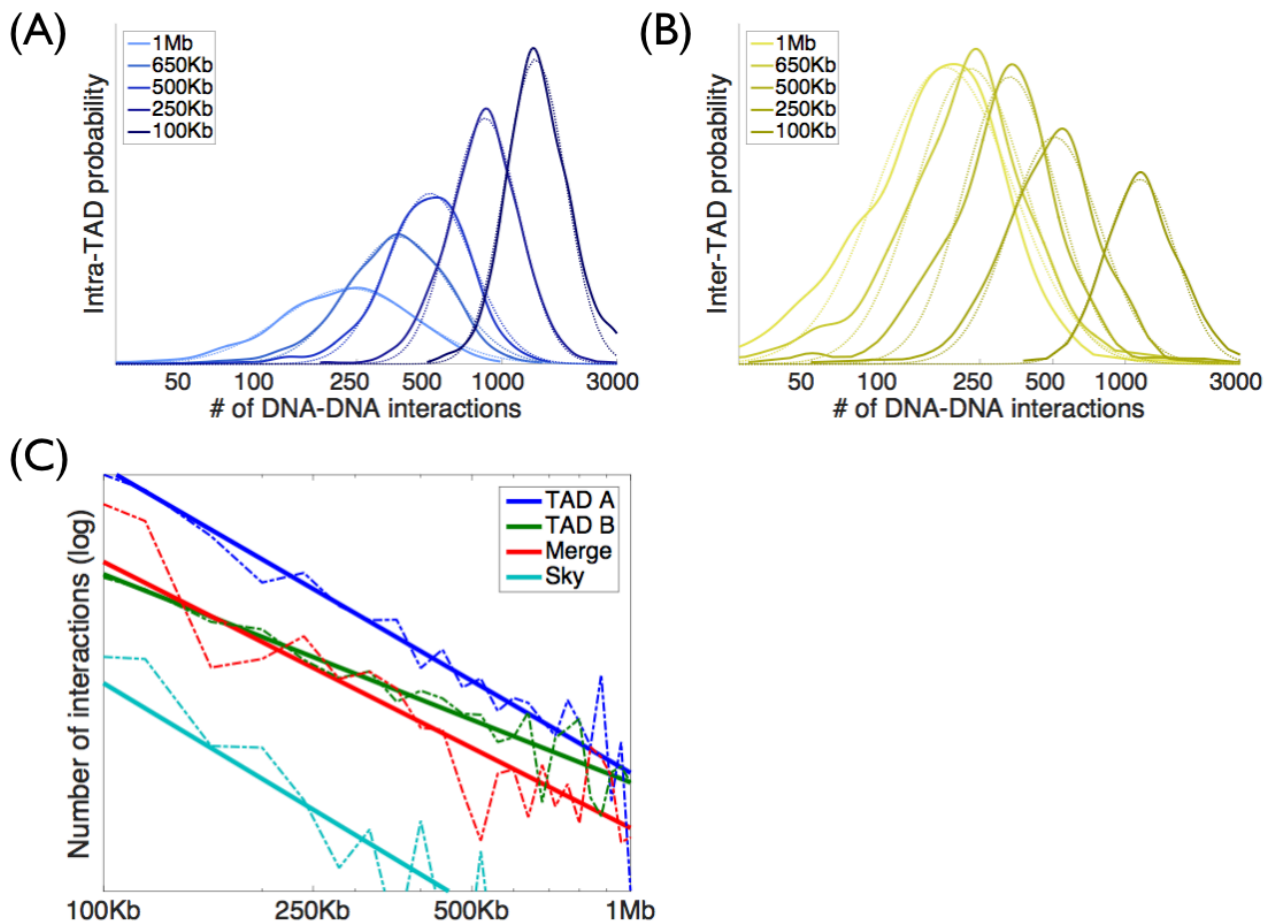

**Figure S1.** (A) Intra-TAD and (B) Inter-TAD histograms and matching log-Normal approximations (shown as dotted lines) for DNA-DNA pairs located 100Kb, 250Kb, 500Kb, 650Kb and 1Mb apart. Shown are data from mouse ES cells, chr 11 (Fraser et al. 2015). Distributions were normalized according to their matching *a priori* probabilities, resulting with increased probability for short-range pairs for the intra-TAD models, and long-range pairs for inter-TAD models. (C) Power-law distributions for TADs A and B (as in Fig 1), their merged interactions and the inter-TAD background interactions (denoted as “Sky”).

116 For every distance  $d$ , we directly estimate the model parameters from annotated Hi-C data. To  
 117 estimate  $\theta_d$ , we rely on an initial (possibly noisy) segmentation of the Hi-C map into domains.  
 118 These could be obtained using various methods, including the directionality index (DI) HMM-based  
 119 method of Dixon et al (Andersson et al. 2014), or approximated iteratively using the Expectation-  
 120 Maximization (EM) algorithm (Dempster et al. 1977). Given such annotations, we consider all intra-  
 121 and inter-TAD pairs and use a maximum likelihood estimation of the mean and the standard  
 122 deviation parameters. The same approach is used to estimate the prior probabilities, namely which  
 123 percent of the DNA-DNA interactions of distance  $d$  occur within, or across, topological domains.

## 124

### 125 Identification of TAD Boundaries using Log Posterior Ratios

126 Using the above probabilistic model, we now wish to re-segment the genome into TADs. For this,  
 127 we propose a score that will integrate information from various distances of DNA-DNA interactions  
 128 across the entire Hi-C matrix, without being skewed by the significantly higher number of  
 129 interactions among nearby DNA-DNA pairs.

130 For this, we define a local score that calculates for every cell in the Hi-C matrix the Log Posterior  
 131 Ratio (LPR) of the intra- and inter-TAD models. Assuming  $N$  interactions for two DNA loci  $d$  bases  
 132 apart, we could use Bayes' law to derive the posterior probability of the intra-TAD model:

$$P_d(TAD|N) = \frac{P_d(TAD)}{P_d(N)} \times P_d(N|TAD) \quad (4)$$

133 and similarly for the inter-TAD model:

$$P_d(BG|N) = \frac{P_d(BG)}{P_d(N)} \times P_d(N|BG) \quad (5)$$

134 and  $LPR_d(N)$ , the Log Posterior Ratio of the two sub-models could be written as:

$$LPR_d(N) = \log \frac{P_d(TAD|N)}{P_d(BG|N)} \quad (6)$$

135 We are now ready to score a segmentation of the genome into domains. First, let us define the  
 136 probabilistic score for a single topological domain  $t$  from position  $s$  to position  $e$

$$S(t) = \sum_{\langle i,j \rangle \in t} LPR_{|i-j|}(N_{i,j}) - \sum_{\langle k,l \rangle \notin t} LPR_{|k-l|}(N_{k,l}) \quad (7)$$

137 Here, we sum the Log Posterior Ratio for all intra-TAD pairs  $\langle i,j \rangle$  where  $s \leq j \leq i \leq e$ , and subtract  
 138 the Log Posterior Ratios (or add the log of the inverse ratio) for all inter-TAD pairs of outside TAD  $t$ ,  
 139 defined by pairs  $\langle i,j \rangle$  up to some maximal distance  $h$  (e.g. 4Mb) such that  $s \leq (i+j)/2 \leq e$ . These  
 140 are shown as blue (intra-) and yellow (inter-TAD) regions in Fig 1C. Probabilistically speaking, we  
 141 allow each Hi-C cell to independently compare its likelihood given each of the two sub-models.  
 142 We then define a global score for a segmentation  $C$  of the genome into a set of TADs, by summing  
 143 over their scores:

$$Score(C) = \sum_{t \in C} S(t) \quad (8)$$

144 Finally, we find the optimal segmentation of each chromosome into topological domains, with  
 145 respect to our model. For this, we use a Dynamic Programming algorithm that recursively  
 146 computes the optimal score of each genomic interval  $C(i,j)$  by comparing its score as a one single  
 147 TAD, or by breaking it at position  $k$  into two distinct regions:

$$Score(C_{i,j}) = \max_{i < k < j} \begin{cases} S(t_{i,j}) \\ Score(C_{i,k}) + Score(C_{k+1,j}) \end{cases} \quad (9)$$

148 This algorithm allows us to efficiently enumerate over all possible configurations  $\{C\}$  and identity  
 149 the optimal segmentation  $C$ , with respect to the above probabilistic score.

## 150 Hierarchical Model of Topological Domains

151 So far, we developed a probabilistic framework for modeling Hi-C data within and across  
 152 topological domains, and presented an efficient algorithm for identifying the optimal segmentation.

153 For this, our model assumed that all intra-TAD DNA-DNA pairs, located  $d$  bases apart, distribute  
154 according to one set of log-Normal parameters, and all inter-TAD pairs use another set.

155 We now wish to alleviate this assumption, and allow each domain to be modeled by a unique set of  
156 parameters. Specifically, we wish to iteratively agglomerative neighboring domains into a  
157 hierarchical structure of topological domains. For this, we developed a “merge score” that allows  
158 us to examine adjacent domains. A naive scoring system for neighboring TADs would simply  
159 quantify their connectivity, by directly counting the number of inter-TAD interactions (Fraser et al.  
160 2015). This score however, might be biased by the size of the two domains, as well as the overall  
161 interaction intensity in each of the two domains. Instead, we calculate for each domain the average  
162 number of DNA-DNA interactions for any distance, and compare these plots to those of the  
163 merged region and inter-TAD regions (Figure S1C). Formally, this translates to finding the optimal  
164  $\alpha$  satisfying:

$$I_{MERGE}(d) \cong \alpha \cdot I_{TAD}(d) + (1 - \alpha) \cdot I_{BG}(d) \quad (10)$$

165 where  $I_{MERGE}$ ,  $I_{TAD}$ , and  $I_{BG}$  denote the average intensities for each  $d$  at the inter-TAD merged area,  
166 the two TADs, and at the inter-TAD background model. We do so iteratively, merging the current  
167 most similar pair (=highest  $\alpha$ ), up to a maximal size of 5Mb for the merged structure, thus creating  
168 a hierarchical forest-like TAD structure, which corresponds to triangles (TADs) and rectangles  
169 (inter-TAD regions).

## 170 **TAD-Specific Background Model of Hi-C Data using a Bi-Linear Power-Law Model**

171 Once we have segmented the Hi-C map into hierarchical domains, we wish to model the expected  
172 intensity of the Hi-C map. Previous works used a power-law scaling model (Lieberman-Aiden et al.  
173 2009, Mirny 2011, Naumova et al. 2013), to describe  $I$  the number of DNA-DNA interactions as  
174 their distance  $\Delta$  exponentiated by some coefficient  $a$ :

$$I(\Delta) \propto \Delta^a \quad (11)$$

175 This is often plotted in log-log scale, where the number of interactions (in log scale) scales linearly  
176 with the distance (in log scale):

$$\log(I) = a \cdot \log(\Delta) + b \quad (12)$$

177 with  $a$  being the power-law coefficient (slope, in log-log plot) and  $b$  is the intersection parameter.

178

179 Nonetheless, while we found the power-law model to be generally accurate, it is clear that some  
180 domains are characterized with a significantly higher number of interactions than others (Fig 1A),  
181 suggesting they would be best described by different power-law parameters (Fig S1C).

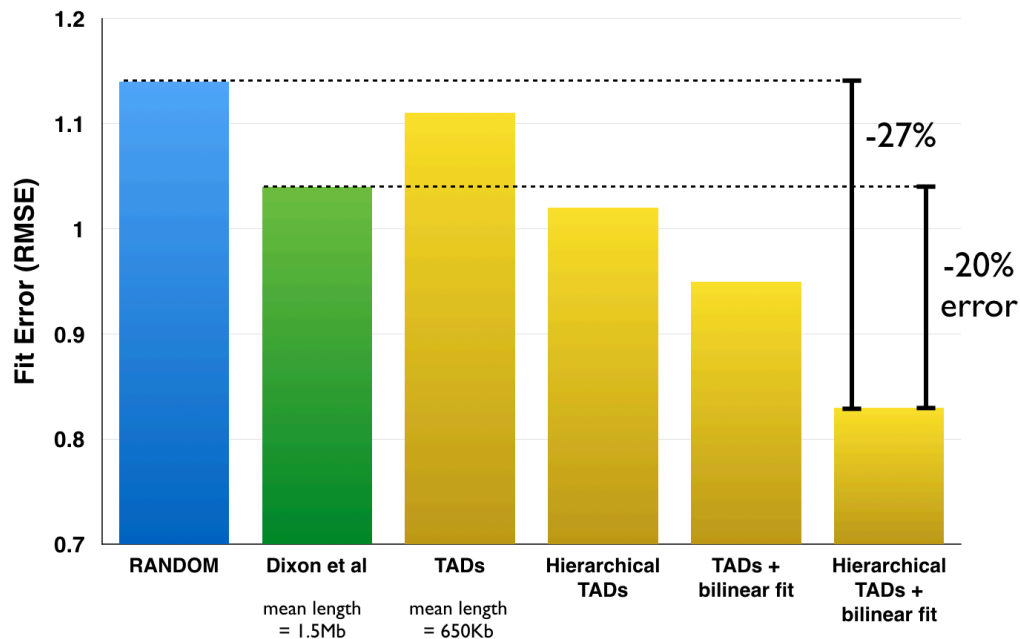

**Figure S2.** PSYCHIC improves the modeling of Hi-C data by over 20%, compared to similar fit models using the original TAD segmentation by Dixon et al (2012). Here, we compare the root mean squared error (RMSE) of the Hi-C matrix (in log scale) with the reconstructed background model (in log scale).

182 We therefore wish to use the hierarchical model of topological domains and construct a local  
183 background model of Hi-C intensity, with local parameters (slope  $a_i$  and intersect  $b_i$ ) for each TAD  
184 and each inter-TAD merged region (Fig 1D). This will allow us to estimate the expected number of  
185 interactions at any distance within every topological domain/merge and quantify the statistical  
186 significance over-represented interactions.

187 Next, we quantified the goodness of fit by each model to the Hi-C data. First, we tested the original  
188 segmentation of the genome for the mouse brain Hi-C data (Dixon et al. 2012). For each TAD we  
189 estimated the optimal power-law parameters  $a_i$  and intersect  $b_i$ , resulting with RMSE score of 1.04,  
190 an improvement of 9% compared to a random segmentation of the genome (RMSE=1.14. Fig S2).  
191 Our segmentation by itself did not yield a better fit (RMSE=1.11), probably due to shorter domains  
192 (mean length of 650Kb, compared to 1.5Mb). Following the hierarchical agglomeration of  
193 neighboring domains, with additional local background model merge, yielded a much better fit  
194 (RMSE=1.02). Finally, we considered a more sophisticated parametric family for modeling Hi-C  
195 interaction data. For this, we developed a piecewise linear regression model for modeling the  
196 average number of interactions (in log scale) for any distance (in log scale) (Fig S3). This richer  
197 power-law model offers a more accurate model (RMSE=0.83), a 20% reduction in the Hi-C fit error  
198 compared to the original TAD-specific power-law fit. Put together, the bilinear power-law fit and the  
199 hierarchical TAD model allows us to model Hi-C interaction data with high accuracy, thus forming a



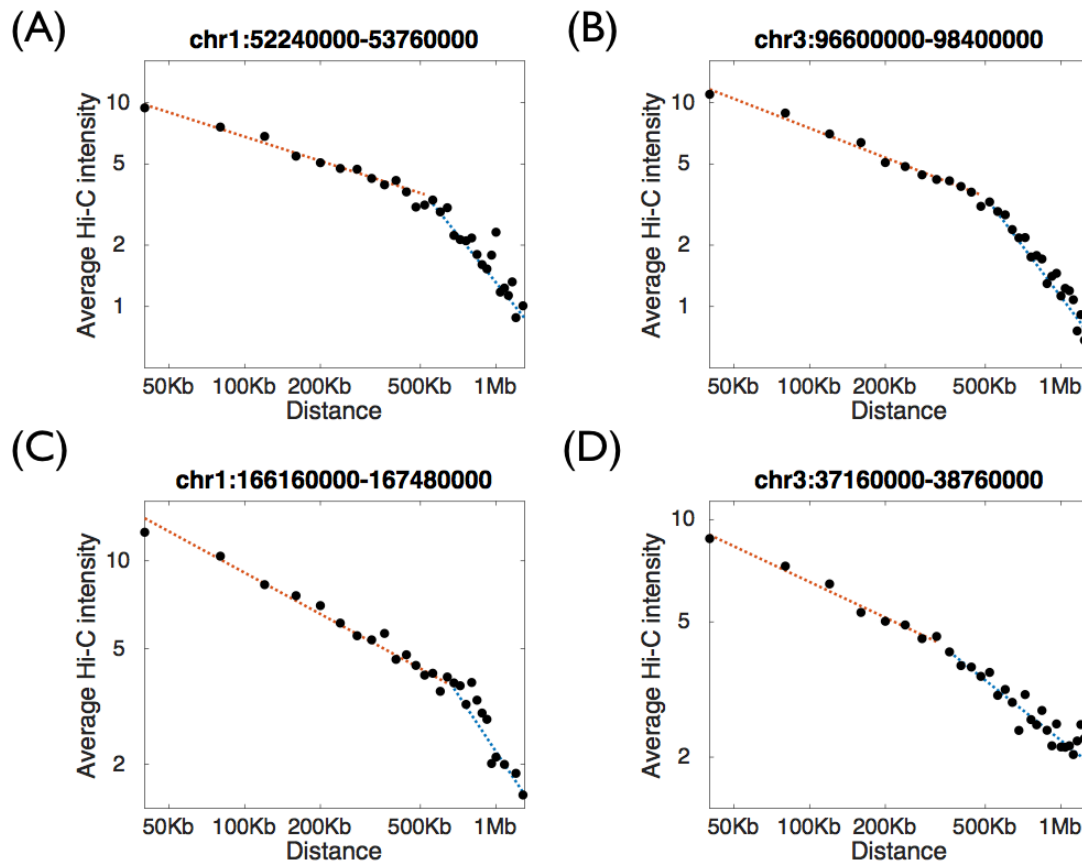

**Figure S3.** TAD-specific bilinear power-law fit of Hi-C data, for four genomic loci using adult mouse Hi-C data (Dixon et al.). Shown are the average numbers of Hi-C interactions (Y-axis) for each genomic distance between the interacting DNA loci (X-axis). Dotted lines mark the piecewise linear fit.

200 detailed background model against which we can compare the data and identify over-represented  
201 DNA-DNA interactions.

## 202 Gene-Wise Identification of Enriched DNA-DNA Interactions

203 We now wish to use the hierarchical TAD-specific bi-linear model as background model for Hi-C,  
204 and identify over-represented DNA-DNA interactions, that could correspond to promoter-enhancer  
205 and other functional interactions in vivo. For this, we aim to compute the “virtual 4C” plot for each  
206 promoter, and compare it to the expected number of interactions according to the background  
207 model. We consider a large genomic region surrounding each promoter ( $\pm 1$ Mb) and search for  
208 enriched Hi-C interactions with the promoter. By subtracting the hierarchical Hi-C background  
209 model from the actual data, we obtain the “residual” over-representation map. To assign a  
210 statistical enrichment score, we model all residual DNA-DNA interactions within this 2Mb window  
211 using a Normal distribution, and calculate the Normal p-value of all regions interacting with the  
212 promoter, following an FDR correction for multiple hypotheses (Benjamini and Hochberg 1995)  
213 (Methods).

214 We begin by focusing the *Foxg1* locus (chr12:50.3Mb-51.2Mb) using Hi-C data from adult mouse  
215 cortex (Dixon et al. 2012). Figure 2A shows the residual map for this locus, with two *Foxg1*  
216 enhancers (hs566 and hs1539) located 550Kb and 750Kb downstream of the gene, with

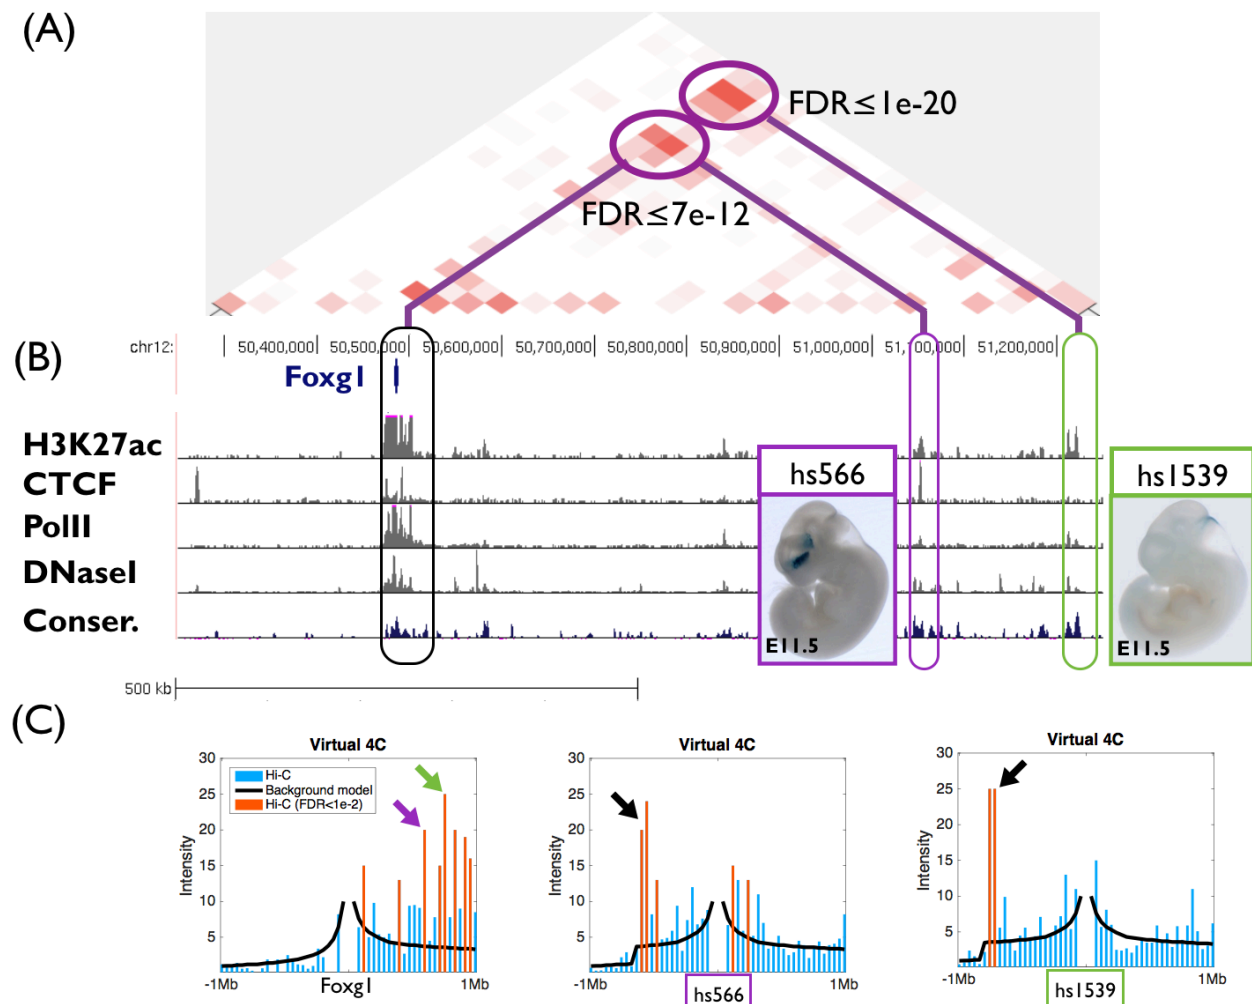

**Figure 2.** PSYCHIC analysis of the *Foxg1* locus in adult mouse cortex Hi-C data (Dixon et al. 2012) identifies two putative enhancer regions, which are enriched with *Foxg1*. **(A)** Residual map for the *Foxg1* locus (chr12:50.3Mb-51.2Mb). These include ChIP-seq marks for active chromatin, and overlap two (human) enhancers validated for brain activity. **(B)** ChIP-seq and conservation data matching active enhancers, within the two putative enhancer regions **(C)** Virtual 4C plots for the *Foxg1* (left) and the two enhancer loci (hs566, middle; and hs1539 right) loci, comparing Hi-C interaction data against local background model reconstructed by PSYCHIC. Arrows mark significant interactions between *Foxg1*, hs566 and the hs1539 orthologous regions.

217 enrichment p-values of  $7e-12$  and  $1e-20$ , respectively (following FDR correction). These two  
 218 enhancers were discovered in human by us and others, using ChIP-seq and conservation data  
 219 (Visel et al. 2007, Visel et al. 2008, Visel et al. 2013). Comparison of our predictions with published  
 220 ChIP-seq data of H3K27ac, CTCF, and PolII, as well as DNaseI hyper-sensitivity data from the  
 221 mouse ENCODE project (Mouse ENCODE Consortium et al. 2012), and evolutionary conservation  
 222 data (Siepel et al. 2005) further identifies the exact location of these *Foxg1* enhancers (Figure 2B).

223

## 224 Genome-Wide Validation of Putative Enhancers

225 To further test our results on a genome-wide scale, we systematically characterized the chromatin  
 226 landscape surrounding all predicted enhancers in the mouse cortex (Dixon et al.). For this, we  
 227 aligned a 4Mb region around each of the 12,278 putative enhancer regions ( $FDR < 1e-2$ ), and

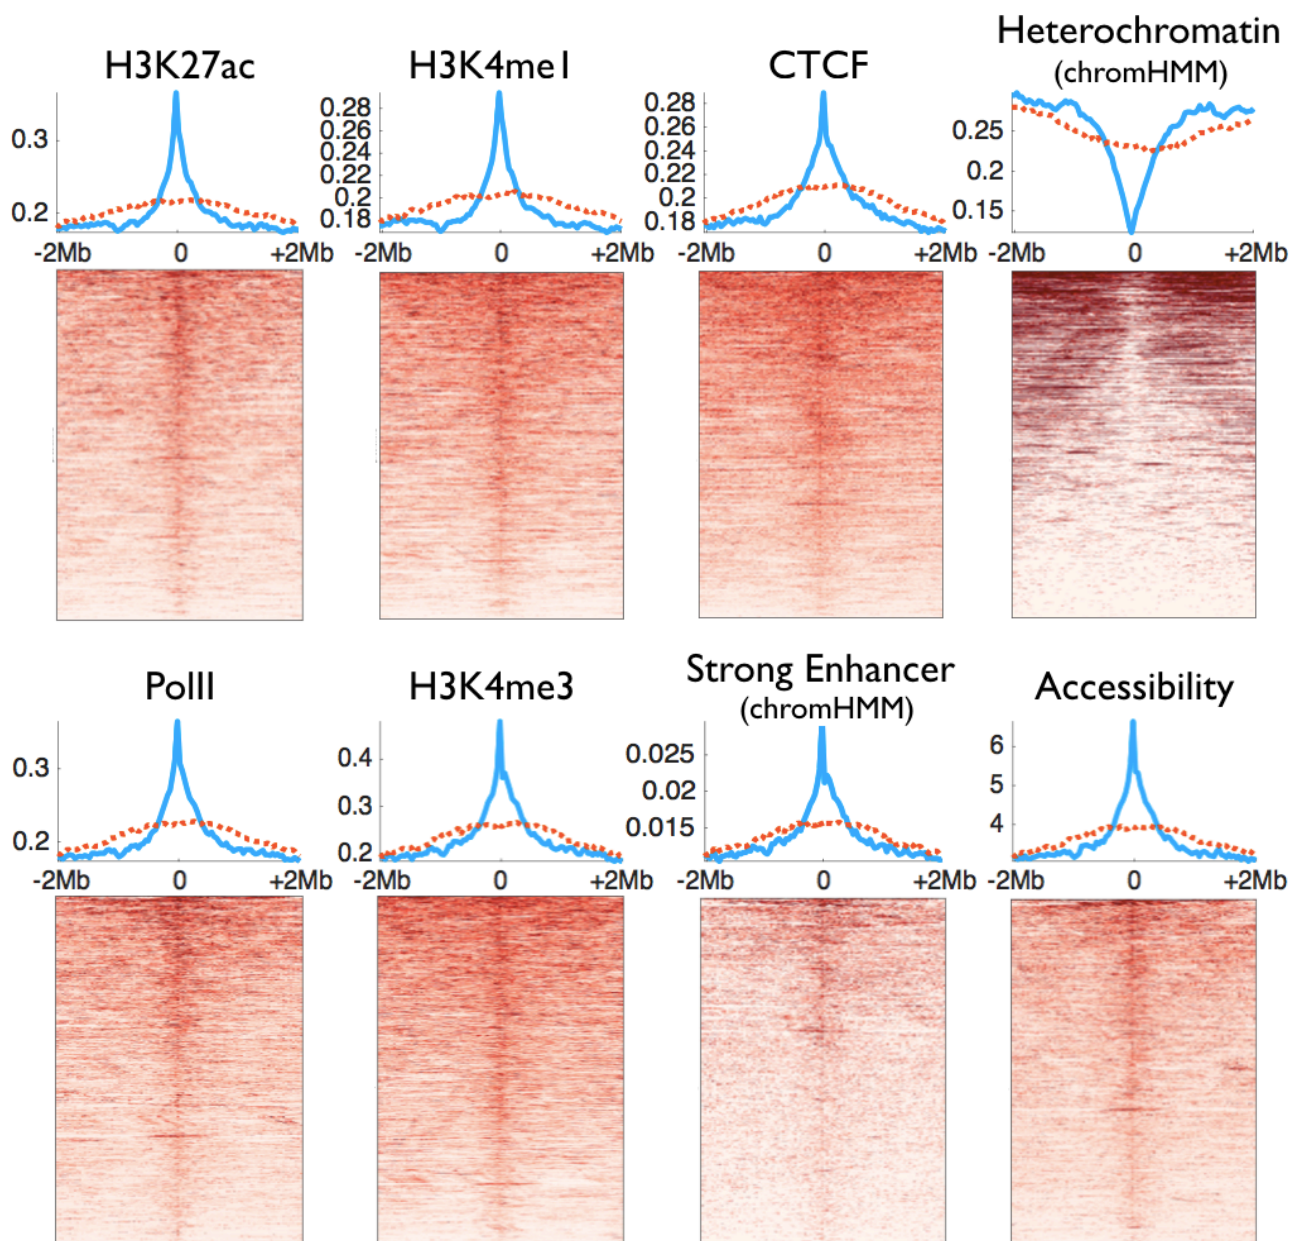

**Figure 3.** Chromatin marks at 4Mb windows centered around 12,278 putative enhancer regions, predicted using adult mouse cortex Hi-C data (FDR<1e-2) (Dixon et al. 2012). Shown are typical enhancer (H3K27ac, H3K4me1) and promoter (H3K4me3, PolII) and CTCF ChIP-seq, chromHMM classification, and DNaseI hypersensitivity assays. Blue lines mark the average signal over all predictions. Dotted red lines mark the signal in a random set of genomic loci, sampled in 2Mb windows around promoter.

228 compared it to various enhancer-related chromatin marks. These include active enhancer marks  
 229 (H3K27ac, H3K4me1), promoter marks (H3K4me3, PolII), architectural proteins (CTCF),  
 230 evolutionary conservation, accessibility, and chromHMM predictions (Siepel et al. 2005, Ernst and  
 231 Kellis 2012, Mouse ENCODE Consortium et al. 2012, Shen et al. 2012). For all data types, the  
 232 predicted enhancers were notably enriched compared to their surrounding flanking regions (i.e.  
 233 regions in 2Mb distance).

234 Since all predicted enhancers are located no more than 2Mb from known promoters, we wanted to  
 235 rule this out as a trivial explanation for the observed enrichment. We therefore constructed a

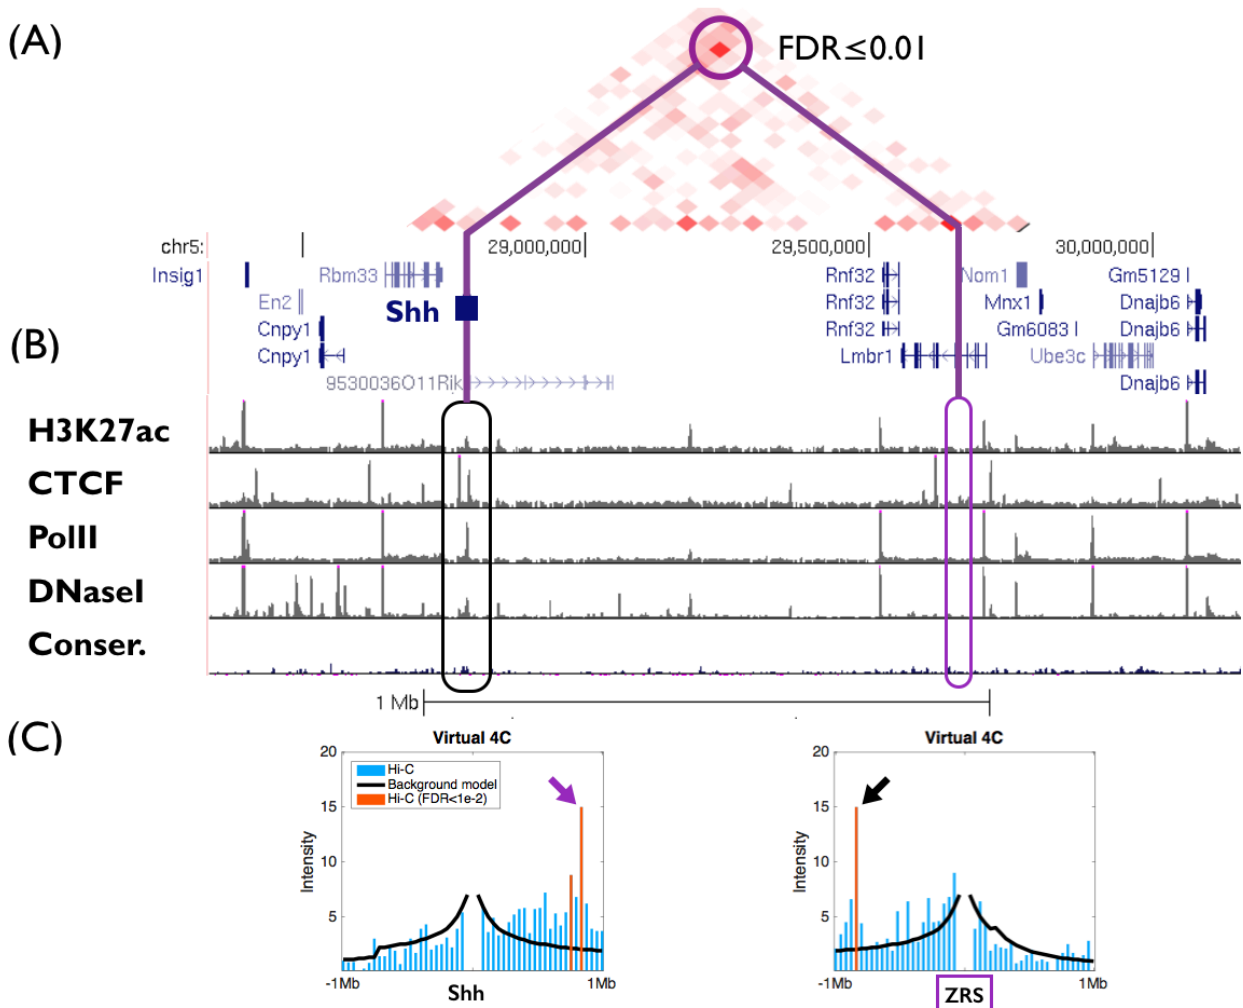

**Figure 4.** Over-represented promoter-enhancer interactions between *Shh* (in adult mouse cortex) and the limb-specific enhancer ZRS (chr5:28.3Mb-30.2Mb). **(A)** Residual map (of Hi-C data compared to the PSYCHIC hierarchical background fit model) identifies over-represented DNA-DNA interaction between the *Shh* and its limb-specific enhancer ZRS. **(B)** Genome-wide ChIP-seq and accessibility data from adult mouse cortex shows no active enhancer marks for this enhancer, suggesting that ZRS is often interacting with *Shh* in the brain. **(C)** Virtual 4C plots for the *Shh* (left) and the ZRS (right) loci, comparing Hi-C interactions with the local background model reconstructed by PSYCHIC. Arrows mark significant between *Shh* and ZRS.

236 similarly sized set of random genomic loci, uniformly sampled around promoters (Fig. 3, red lines).  
 237 These only show low (15%) enrichment compared to flanking regions.  
 238 Notably, most - but not all - putative enhancers show strong enrichment for active chromatin  
 239 marks. For example, about 70% of the  $1e-2$  predicted enhancers show increased accessibility  
 240 compared to their flanking DNA regions (Fig. 3, "Accessibility"). Almost half (46%) of the predicted  
 241 enhancer regions show enrichment that is greater than one standard deviation compared to their  
 242 flanking regions (32% > 2SD). For comparison, only 43% of the randomly selected regions show  
 243 increased accessibility, with only 24% exceeding one standard deviation (15% > 2SD). Similar  
 244 numbers are obtained for H3K27ac or CTCF.

245 This suggests that over-represented DNA-DNA interactions (in Hi-C) are not limited to active and  
 246 accessible regions, and raises the hypothesis that a non-trivial fraction of the putative enhancer  
 247 regions we have identified are "silent" and inaccessible. A closer examination identified several

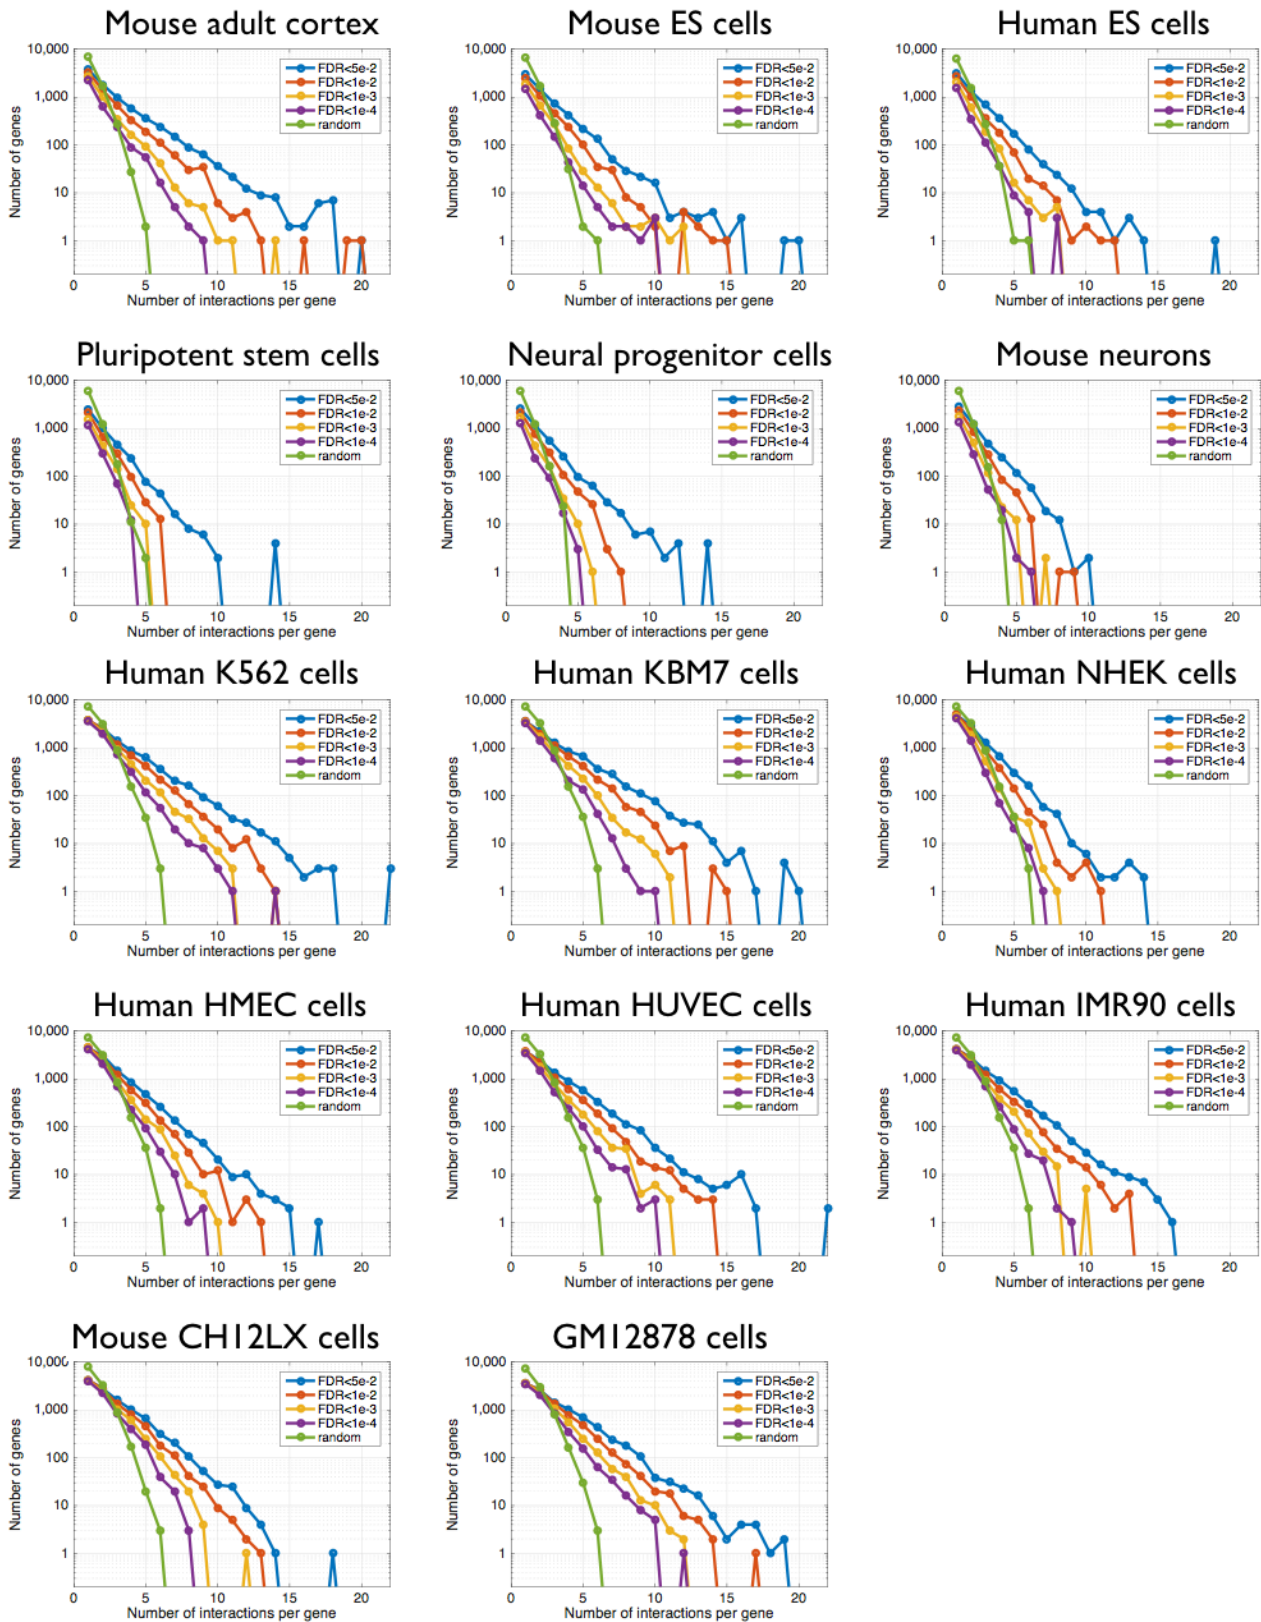

**Figure S5. Number of predicted enhancer regions per gene.** For each Hi-C dataset, we ran PSYCHIC and predicted putative interactions for each promoter (up to a maximal distance of 1Mb), using several thresholds of statistical enrichment (FDR values of 0.05, 0.01, 1e-3 and 1e-4). Shown are the numbers of genes (Y-axis) predicted to be regulated by X putative enhancer regions (X-axis), compared to a random set of gene-surrounding genomic loci (in green, total size similar to the FDR<1e-2 set of putative enhancers).

248 known enhancers even within those. For example, PSYCHIC identified the ZRS locus as  
 249 interacting with the *Shh* gene, even in adult mouse cortex (Fig. 4). In the mouse, early

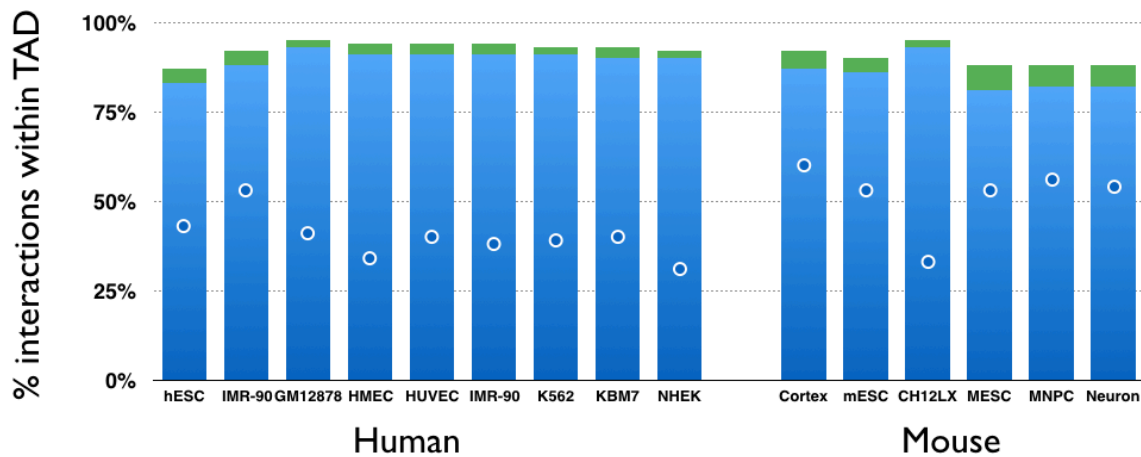

**Figure 5. Most putative enhancers reside within the same TAD as their targets.** For each of the 15 human and mouse Hi-C experiments we analyzed, the Y-axis shows the percent of predicted DNA-DNA pairs to fall within the same topological domains. Green supplements show the percent of additional pairs falling within 1<sup>st</sup> level of TAD-TAD hierarchical merges. Blue dots show percent of “random” enhancers residing within the same TAD.

250 developmental *Shh* expression is essential for correct autopod formation, and is regulated in the  
251 developing limbs by the distal ZRS enhancer, located ~1Mb away (Lettice et al. 2003, Sagai et al.  
252 2005). Our results suggest that ZRS is in close physical proximity to *Shh* even in the adult brain  
253 (Fig. 4). This was recently validated by DNA FISH showing ZRS in the proximity of *Shh* throughout  
254 a variety of tissues and developmental stages, while not being in active transcription (Williamson et  
255 al. 2016).

## 256 257 **A Comprehensive Catalogue of Human and Mouse Enhancers**

258 To obtain a comprehensive list of putative enhancer regions, we have gathered Hi-C data in 15  
259 conditions and cell types in human and mouse, including mouse cortex and embryonic stem cells  
260 (Dixon et al. 2012), mouse embryonic stem cells, neural progenitor cells (NPC), and neurons  
261 (Fraser et al. 2015), and mouse B-lymphoblast (CH12LX) cells (Rao et al. 2014), as well as human  
262 embryonic stem cells and lung fibroblast IMR-90 cells (Dixon et al. 2012), GM12878 B-  
263 lymphoblastoid cells, and HMEC, HUVEC, IMR-90, K562, KBM7, and NHEK cells lines (Rao et al.  
264 2014). Globally, with an enrichment FDR threshold of 0.05, we predicted 320,737 putative  
265 enhancers (90,113 in mouse and 230,624 in human) that regulate a total of 27,497 genes (19,016  
266 in mouse and 21,000 in human). A more stringent FDR threshold of 1e-4, yields 123,149 putative  
267 enhancer regions (29,732 and 93,417) regulating 22,365 genes (12,603 and 16,919 for mouse and  
268 human respectively). These are summarized in Table S1 and on our supplementary webpage  
269 [www.cs.huji.ac.il/~tommy/PSYCHIC](http://www.cs.huji.ac.il/~tommy/PSYCHIC).

270 Next, we calculated the distribution over the number of putative enhancers regulating each gene,  
271 and compared it to the distribution of randomly selected regions (equivalent to a “random set” of  
272 enhancers, chosen with an FDR threshold of 1e-2. See Methods). As shown in Figure S5, for all  
273 analyzed Hi-C experiments, we observed a much greater number of genes predicted to be

274 regulated by multiple enhancer regions, compared to the random set. Our results show some  
275 genes to be regulated by ten and more enhancers. For example, 443 genes are predicted to have  
276 five brain enhancer regions ( $FDR < 1e-2$ ), compared to only two in the randomized set, or three  
277 expected according to a binomial distribution.

278 Finally, we tested whether the predicted enhancer regions tend to reside within the same TAD as  
279 their target genes (Fig. 5). Our analyses suggest that about 88% of predicted enhancer regions (in  
280 all 15 analyzed datasets, mouse and human) are indeed within the same domain as their targets,  
281 compared to 45% of equally distant random loci. One should note that typically the topological  
282 domains called by PSYCHIC are rather short (mean length of 650Kb, compared to ~1.5Mb for  
283 Dixon et al). When considering the inferred hierarchical organization of the genome, we observe  
284 the 92% of putative enhancer regions reside within the same TAD or the first level of merging as its  
285 target, (Fig. 5, green supplements) compared to 59% at random.

## 286 Discussion

287 In this work we presented PSYCHIC, a computational model for analyzing Hi-C data to identify  
288 enriched DNA-DNA interactions. Using a probabilistic model and efficient algorithms, PSYCHIC  
289 identifies the optimal segmentation of chromosomes into topological domains, assembles them into  
290 hierarchical structures, and fits a TAD-specific background model for the Hi-C data. By considering  
291 a “virtual 4C” plot for every gene, and using the background model for statistical assessments, our  
292 algorithm identified 320,737 significant over-represented Enhancer-Promoter interactions in 15 Hi-  
293 C experiments in human and mouse.

294 To segment the genome into TADs, our algorithm uses a probabilistic two-component model that  
295 independently computes for every cell in the Hi-C matrix the likelihood ratio between intra-TAD and  
296 inter-TAD models. This score assigns similar importance to near and far DNA-DNA interactions,  
297 and therefore is less affected by the exponentially higher number of short-range interactions that  
298 dominate the Hi-C data, but are mostly invariant of the overall arrangement of the genome in  
299 topological domains. In addition, this score is additive and can be easily computed from smaller  
300 nested TADs, allowing for a fast and scalable Dynamic Programming algorithm that identifies the  
301 optimal segmentation for each chromosome.

302 For agglomerating individual TADs into hierarchical structures and for the computation of TAD-  
303 specific background models, we compute the “interaction spectrum” of each TAD. Specifically, we  
304 calculate the average number of Hi-C interactions for DNA-DNA interactions at any distance. While  
305 this spectrum was previously modeled by a power-law, our results indicate that replacing the  
306 power-law model by a two-segment power-law model greatly improves the model accuracy.  
307 Initially, we suspected that this could be due to a mixing effect of two cell populations, each with a  
308 different chromosomal organization (and power-law parameters). Alas, this hypothesis cannot hold

309 true, as the sum of two negative power-law functions is always convex, in contrast to the concave  
310 behavior of most intensity plots we observe. Instead, these results suggest that the power-law  
311 breaking point, typically at 100-300Kb could reflect a transition between two molecular  
312 mechanisms used for chromosomal packaging at different hierarchies.

313 Currently, most available Hi-C data are of rather low resolution varying from 10 to 40Kb. Naturally,  
314 this hinders our ability to pinpoint Promoter-Enhancer interactions in high resolution. Nonetheless,  
315 various genomic methods for identifying enhancer regions within over-represented DNA-DNA  
316 interactions – including ChIP-seq for transcription factors and active histone marks, genomic  
317 accessibility, evolutionary conservation or computational sequence-based approaches could all be  
318 applied to further analyze putative enhancer regions in higher resolution.

319 As we showed, both for *Foxg1* in the mouse cortex, and later on a genome-wide scale, these  
320 putative enhancer regions, defined by over-represented number of Hi-C interactions with promoter  
321 regions, typically contain accessible sub-regions that are also enriched for active chromatin marks  
322 (H3K27ac, H3K4me1), evolutionary conservation, and are typically often bound by CTCF and PolII.  
323 Intriguingly, a closer examination of the data reveals that about a third of the predicted regions are  
324 inaccessible and bear no active chromatin marks. These include for example, the ZRS locus that  
325 acts as a limb-specific distal enhancer for *Shh*, located nearly ~1 Mb away. While the ZRS locus  
326 shows no accessibility or ChIP peaks in the mouse cortex, and is therefore predicted to be inactive  
327 it presents a significant number of interactions with its target gene *Shh*. Indeed, Williamson et al.  
328 (2016) recently used FISH and 5C to show that indeed ZRS and *Shh* are located in spatial  
329 proximity regardless of their activity.

330 These results suggest that the 3D structure of the genome may be organized to support regulatory  
331 DNA-DNA interactions, rather than merely reflect the set of accessible or active regions of the  
332 genome. As more Hi-C is collected and analyzed, we hope to shed light on the causality of gene  
333 regulation and genome packaging, as well as the plasticity of genome packaging in general.

334 Put together, we demonstrated how Hi-C data – typically used to identify TAD boundaries – could  
335 be also used to reconstruct a local TAD-specific background model that identifies enriched DNA-  
336 DNA interactions, and in particular interactions between enhancers and their target genes.

337

## 338 **Methods**

### 339 **Piece-wise Linear Regression of log (Intensity) and log (Distance)**

340 We model the Hi-C interaction intensity between two loci as a segmented power-law function of  
341 their distance. In log-log scale this is modeled by a two-piece segmented linear regression model.  
342 For this, we developed a computational algorithm (implemented in MATLAB) to iterate over the  
343 optimal breaking point and estimates the two parameters (intercept and slope) for each segment,



344 while minimizing the squared deviation of the data (in log-log scale). Similarly, a piece-wise linear  
345 model was learned for the remaining inter-TAD regions.

346

### 347 **TAD Merges**

348 Neighboring TADs are merged into a hierarchical structure, according to a “merge score” that  
349 compares the mean Hi-C intensity per distance within the two underlying TADs, their inter-TAD  
350 area, and the null inter-TAD model (represented by  $\alpha$  in Eq. 10). We then iteratively merge the two  
351 neighboring TADs whose merge area is the most similar, up to a maximal domain size of 5Mb.

352

### 353 **Random set of enhancers**

354 To obtain a random set of locations along the genome, while maintaining a similar distribution  
355 around gene promoters, we considered for each gene all genomic loci up to 1Mb away (on either  
356 direction), and selected each with a probability of  $1e-2$ .

357

### 358 **Statistical Enrichment Score**

359 To assign a statistical significance score (p-value) for each putative enhancer (namely, an over-  
360 represented interaction between a promoter region and some other locus), we assumed a Normal  
361 distribution of the local residual map (i.e. Hi-C minus PSYCHIC background mode) at a 2Mb  
362 surrounding the promoter of each gene. We then fitted maximum likelihood estimator for the mean  
363 value  $\mu_i$ , and its standard deviation  $\sigma_i$ , and used these statistics to translate the deviation of each  
364 Hi-C cell from its background model, into z-scores. Finally, we assigned a p-value for each z-score  
365 using a standard Normal cumulative distribution function, and applied a FDR correction for multiple  
366 hypothesis (Benjamini and Hochberg 1995).

367

### 368 **Genomic analysis of Putative Enhancers**

369 We used deepTools (Ramírez et al. 2014) to align putative enhancers and generate heatmaps for  
370 a 4Mb window surrounding each region, for various genomic data tracks (bigwig files). To estimate  
371 the deviation of the putative enhancer location, compared to its surrounding, we estimated the  
372 parameters of a Normal distribution based on the two 400Kb regions for each putative enhancer  
373 region, located 1.6-2Mb apart on either direction.

374

### 375 **Data availability:**

376 PSYCHIC is publicly available via GitHub (<https://github.com/dhkron/PSYCHIC>). A full list of  
377 putative enhancer regions, as well as the genes they regulate is available in Supplemental Table  
378 S1, and in our supplemental website at [www.cs.huji.ac.il/~tommy/PSYCHIC](http://www.cs.huji.ac.il/~tommy/PSYCHIC). Also available in our  
379 website are saved UCSC Genome Browser sessions for mouse (mm9) and human (hg19).

380

## 381 **Acknowledgements**

382 We would like to thank Nir Friedman, Eran Rosenthal, Shira Strauss, and members of the Kaplan  
383 lab for helpful discussions and comments.

384

## 385 **Funding**

386 TK is a member of the Israeli Center of Excellence (I-CORE) for Gene Regulation in Complex  
387 Human Disease (no. 41/11) and the Israeli Center of Excellence (I-CORE) for Chromatin and RNA  
388 in Gene Regulation (no. 1796/12). This research was also supported by a Marie Curie Integration  
389 Grant (no. PCIG13-GA-2013-618327), and an Israel Science Foundation grant (no. 913/15) to TK.

## 390 **Competing interests**

391 The authors declare that they have no competing interests.

## 392 **References**

- 393 1. Achinger-Kawecka J and Clark SJ (2016). Disruption of the 3D cancer genome blueprint. *Epigenomics*.
- 394 2. Adhikari B, Trieu T and Cheng J (2016). Chromosome3D: reconstructing three-dimensional  
395 chromosomal structures from Hi-C interaction frequency data using distance geometry simulated  
396 annealing. *BMC genomics*. 17(1): 886.
- 397 3. Andersson R, Gebhard C, Miguel-Escalada I, et al. (2014). An atlas of active enhancers across human  
398 cell types and tissues. *Nature*. 507(7493): 455-61.
- 399 4. Ay F, Bailey TL and Noble WS (2014). Statistical confidence estimation for Hi-C data reveals regulatory  
400 chromatin contacts. *Genome Research*. 24(6): 999-1011.
- 401 5. Benjamini Y and Hochberg Y (1995). Controlling the false discovery rate: a practical and powerful  
402 approach to multiple testing. *Journal of the royal statistical society. Series B (Methodological)*. 289-  
403 300.
- 404 6. Bickmore WA and van Steensel B (2013). Genome architecture: domain organization of interphase  
405 chromosomes. *Cell*. 152(6): 1270-84.
- 406 7. Blinka S, Reimer MH, Pulakanti K and Rao S (2016). Super-Enhancers at the Nanog Locus Differentially  
407 Regulate Neighboring Pluripotency-Associated Genes. *Cell Rep*. 17(1): 19-28.
- 408 8. Chen J, Hero AO, 3rd and Rajapakse I (2016). Spectral identification of topological domains.  
409 *Bioinformatics*. 32(14): 2151-8.
- 410 9. Claussnitzer M, Dankel SN, Kim K-H, et al. (2015). FTO Obesity Variant Circuitry and Adipocyte  
411 Browning in Humans. *New England Journal of Medicine*. 373(10): 895-907.
- 412 10. de Laat W and Duboule D (2013). Topology of mammalian developmental enhancers and their  
413 regulatory landscapes. *Nature*. 502(7472): 499-506.
- 414 11. Dekker J and Mirny L (2016). The 3D Genome as Moderator of Chromosomal Communication. *Cell*.  
415 164(6): 1110-21.
- 416 12. Demare LE, Leng J, Cotney J, et al. (2013). The genomic landscape of cohesin-associated chromatin  
417 interactions. *Genome Research*.
- 418 13. Dempster AP, Laird NM and Rubin DB (1977). Maximum likelihood from incomplete data via the EM  
419 algorithm. *Journal of the royal statistical society. Series B (Methodological)*.
- 420 14. Dileep V, Ay F, Sima J, et al. (2015). Topologically associating domains and their long-range contacts  
421 are established during early G1 coincident with the establishment of the replication-timing program.  
422 *Genome Research*.
- 423 15. Dixon JR, Selvaraj S, Yue F, et al. (2012). Topological domains in mammalian genomes identified by  
424 analysis of chromatin interactions. *Nature*. 485(7398): 376-80.
- 425 16. Doyle B, Fudenberg G, Imakaev M and Mirny LA (2014). Chromatin loops as allosteric modulators of  
426 enhancer-promoter interactions. *PLoS Computational Biology*. 10(10): e1003867.
- 427 17. Ernst J and Kellis M (2012). ChromHMM: automating chromatin-state discovery and characterization.  
428 *Nature Methods*. 9(3): 215-6.

- 429 18. Franke M, Ibrahim DM, Andrey G, et al. (2016). Formation of new chromatin domains determines  
430 pathogenicity of genomic duplications. **Nature**.
- 431 19. Fraser J, Ferrai C, Chiariello AM, et al. (2015). Hierarchical folding and reorganization of chromosomes  
432 are linked to transcriptional changes in cellular differentiation. **Mol Syst Biol**. 11(12): 852.
- 433 20. Fraser P and Bickmore W (2007). Nuclear organization of the genome and the potential for gene  
434 regulation. **Nature**. 447(7143): 413-7.
- 435 21. Fudenberg G, Imakaev M, Lu C, et al. (2016). Formation of Chromosomal Domains by Loop Extrusion.  
436 **Cell reports**.
- 437 22. Fulco CP, Munschauer M, Anyoha R, et al. (2016). Systematic mapping of functional enhancer-promoter  
438 connections with CRISPR interference. **Science**.
- 439 23. Gómez-Marín C, Tena JJ, Acemel RD, et al. (2015). Evolutionary comparison reveals that diverging  
440 CTCF sites are signatures of ancestral topological associating domains borders. **Proceedings of the**  
441 **National Academy of Sciences**. 112(24): 7542-7.
- 442 24. Handoko L, Xu H, Li G, et al. (2011). CTCF-mediated functional chromatin interactome in pluripotent  
443 cells. **Nature Genetics**. 43(7): 630-8.
- 444 25. Ing-Simmons E, Seitan V, Faure A, et al. (2015). Spatial enhancer clustering and regulation of  
445 enhancer-proximal genes by cohesin. **Genome Research**. gr.184986.114.
- 446 26. Jager R, Migliorini G, Henrion M, et al. (2015). Capture Hi-C identifies the chromatin interactome of  
447 colorectal cancer risk loci. **Nat Commun**. 6: 6178.
- 448 27. Jin F, Li Y, Dixon JR, et al. (2013). A high-resolution map of the three-dimensional chromatin  
449 interactome in human cells. **Nature**. 503(7475): 290-4.
- 450 28. Kieffer-Kwon K-R, Tang Z, Mathe E, et al. (2013). Interactome Maps of Mouse Gene Regulatory  
451 Domains Reveal Basic Principles of Transcriptional Regulation. **Cell**. 155(7): 1507-20.
- 452 29. Lajoie BR, Dekker J and Kaplan N (2015). The Hitchhiker's guide to Hi-C analysis: Practical guidelines.  
453 **Methods**. 72: 65-75.
- 454 30. Lettice LA, Heaney SJH, Purdie LA, et al. (2003). A long-range Shh enhancer regulates expression in  
455 the developing limb and fin and is associated with preaxial polydactyly. **Human Molecular Genetics**.  
456 12(14): 1725-35.
- 457 31. Lévy-Leduc C, Delattre M, Mary-Huard T and Robin S (2014). Two-dimensional segmentation for  
458 analyzing Hi-C data. **Bioinformatics**. 30(17): i386-92.
- 459 32. Lieberman-Aiden E, van Berkum NL, Williams L, et al. (2009). Comprehensive mapping of long-range  
460 interactions reveals folding principles of the human genome. **Science**. 326(5950): 289-93.
- 461 33. Lupiáñez DG, Kraft K, Heinrich V, et al. (2015). Disruptions of Topological Chromatin Domains Cause  
462 Pathogenic Rewiring of Gene-Enhancer Interactions. **Cell**.
- 463 34. Mifsud B, Tavares-Cadete F, Young AN, et al. (2015). Mapping long-range promoter contacts in human  
464 cells with high-resolution capture Hi-C. **Nat Genet**. 47(6): 598-606.
- 465 35. Mirny LA (2011). The fractal globule as a model of chromatin architecture in the cell. **Chromosome**  
466 **Res**. 19(1): 37-51.
- 467 36. Mouse ENCODE Consortium, Stamatoyannopoulos JA, Snyder M, et al. (2012). An encyclopedia of  
468 mouse DNA elements (Mouse ENCODE). **Genome Biol**. 13(8): 418.
- 469 37. Naumova N, Imakaev M, Fudenberg G, et al. (2013). Organization of the mitotic chromosome. **Science**.  
470 342(6161): 948-53.
- 471 38. Nichols MH and Corces VG (2015). A CTCF Code for 3D Genome Architecture. **Cell**. 162(4): 703-5.
- 472 39. Nora EP, Lajoie BR, Schulz EG, et al. (2012). Spatial partitioning of the regulatory landscape of the X-  
473 inactivation centre. **Nature**. 485(7398): 381-5.
- 474 40. Ong C-T and Corces VG (2014). CTCF: an architectural protein bridging genome topology and function.  
475 **Nat Reviews Genetics**. 15(4): 234-46.
- 476 41. Pope BD, Ryba T, Dileep V, et al. (2014). Topologically associating domains are stable units of  
477 replication-timing regulation. **Nature**. 515(7527): 402-5.
- 478 42. Ramírez F, Dündar F, Diehl S, Grüning BA and Manke T (2014). deepTools: a flexible platform for  
479 exploring deep-sequencing data. **Nucleic Acids Research**. 42(Web Server issue): W187-91.
- 480 43. Rao SSP, Huntley MH, Durand NC, et al. (2014). A 3D map of the human genome at kilobase resolution  
481 reveals principles of chromatin looping. **Cell**. 159(7): 1665-80.
- 482 44. Rowley MJ and Corces VG (2016). The three-dimensional genome: principles and roles of long-distance  
483 interactions. **Curr Opin Cell Biol**. 40: 8-14.
- 484 45. Ryba T, Hiratani I, Lu J, et al. (2010). Evolutionarily conserved replication timing profiles predict long-  
485 range chromatin interactions and distinguish closely related cell types. **Genome Research**. 20(6): 761-  
486 70.

- 487 46. Sagai T, M H, Y M, M T and T S (2005). Elimination of a long-range cis-regulatory module causes  
488 complete loss of limb-specific Shh expression and truncation of the mouse limb. **Development**. 132(4):  
489 797-803.
- 490 47. Seitan VC, Faure AJ, Zhan Y, et al. (2013). Cohesin-based chromatin interactions enable regulated  
491 gene expression within preexisting architectural compartments. **Genome Research**. 23(12): 2066-77.
- 492 48. Shen Y, Yue F, McCleary DF, et al. (2012). A map of the cis-regulatory sequences in the mouse  
493 genome. **Nature**. 488(7409): 116-20.
- 494 49. Siepel A, Bejerano G, Pedersen JS, et al. (2005). Evolutionarily conserved elements in vertebrate,  
495 insect, worm, and yeast genomes. **Genome Research**. 15(8): 1034-50.
- 496 50. Simonis M, Klous P, Splinter E, et al. (2006). Nuclear organization of active and inactive chromatin  
497 domains uncovered by chromosome conformation capture-on-chip (4C). **Nature Genetics**. 38(11):  
498 1348-54.
- 499 51. Symmons O, Uslu VV, Tsujimura T, et al. (2014). Functional and topological characteristics of  
500 mammalian regulatory domains. **Genome Res**. 24(3): 390-400.
- 501 52. Taberlay PC, Achinger-Kawecka J, Lun ATL, et al. (2016). Three-dimensional disorganization of the  
502 cancer genome occurs coincident with long-range genetic and epigenetic alterations. **Genome Res**.  
503 26(6): 719-31.
- 504 53. Tang Z, Luo OJ, Li X, et al. (2015). CTCF-Mediated Human 3D Genome Architecture Reveals  
505 Chromatin Topology for Transcription. **Cell**. 163(7): 1611-27.
- 506 54. Van Steensel B and Dekker J (2010). Genomics tools for unraveling chromosome architecture. **Nat**  
507 **Biotechnology**. 28(10): 1089-95.
- 508 55. Vietri Rudan M, Barrington C, Henderson S, et al. (2015). Comparative Hi-C Reveals that CTCF  
509 Underlies Evolution of Chromosomal Domain Architecture. **Cell reports**. 10(8): 1297-309.
- 510 56. Visel A, Minovitsky S, Dubchak I and LA. P (2007). VISTA Enhancer Browser—a database of tissue-  
511 specific human enhancers. **Nucleic Acids Research**.
- 512 57. Visel A, Prabhakar S, Akiyama JA, et al. (2008). Ultraconservation identifies a small subset of extremely  
513 constrained developmental enhancers. **Nature Genetics**. 40(2): 158-60.
- 514 58. Visel A, Rubin EM and Pennacchio LA (2009). Genomic views of distant-acting enhancers. **Nature**.  
515 461(7261): 199-205.
- 516 59. Visel A, Taher L, Girgis H, et al. (2013). A High-Resolution Enhancer Atlas of the Developing  
517 Telencephalon. **Cell**. 152(4): 895-908.
- 518 60. Williamson I, Lettice LA, Hill RE and Bickmore WA (2016). Shh and ZRS enhancer co-localisation is  
519 specific to the zone of polarizing activity. **Development**.
- 520 61. Xu Z, Zhang G, Wu C, Li Y and Hu M (2016). FastHiC: a fast and accurate algorithm to detect long-  
521 range chromosomal interactions from Hi-C data. **Bioinformatics**.
- 522 62. Zhang Y, Wong C-H, Birnbaum RY, et al. (2013). Chromatin connectivity maps reveal dynamic  
523 promoter-enhancer long-range associations. **Nature**.
- 524 63. Zuin J, Dixon JR, van der Reijden MIJA, et al. (2014). Cohesin and CTCF differentially affect chromatin  
525 architecture and gene expression in human cells. **Proceedings of the National Academy of Sciences**.  
526 111(3): 996-1001.
- 527
